# Supplementary material for: A New Horizon for Evaluating Tire Grip Within a Laboratory Environment
Source: Springer Nature journal article supplement (doi:10.1007/s11249-020-1273-5), 2020-02-12
Supplement: MOESM1 [file 17694364]

# Supplementary data

Table 10: Tire temperatures from the trailer α-sweep tests at different angles and loads for all tread compounds; at constant speed of 60 km/h according to section ‎2.1.

|  |  | Slip angle (º) | | | | | | | | |
| --- | --- | --- | --- | --- | --- | --- | --- | --- | --- | --- |
| Tire load (kg) | Compound | -12 | -9 | -6 | -3 | 0 | 3 | 6 | 9 | 12 |
| 350 | C1 | 62 | 58 | 52 | 44 | 41 | 43 | 51 | 58 | 63 |
| C2 | 60 | 57 | 51 | 43 | 39 | 39 | 48 | 56 | 60 |
| C3 | 65 | 59 | 51 | 42 | 40 | 41 | 50 | 59 | 64 |
| C4 | 64 | 59 | 52 | 44 | 42 | 44 | 53 | 61 | 66 |
| C5 | 71 | 64 | 55 | 45 | 43 | 45 | 54 | 64 | 74 |
| C6 | 59 | 53 | 46 | 38 | 36 | 38 | 47 | 56 | 65 |
| 500 | C1 | 61 | 57 | 51 | 45 | 42 | 43 | 49 | 56 | 62 |
| C2 | 60 | 56 | 49 | 43 | 41 | 42 | 49 | 56 | 61 |
| C3 | 63 | 58 | 50 | 43 | 41 | 42 | 49 | 58 | 64 |
| C4 | 63 | 58 | 50 | 44 | 42 | 44 | 51 | 59 | 65 |
| C5 | 76 | 68 | 58 | 50 | 47 | 47 | 55 | 66 | 75 |
| C6 | 57 | 53 | 47 | 40 | 38 | 38 | 45 | 53 | 60 |
| 700 | C1 | 65 | 61 | 54 | 45 | 42 | 44 | 53 | 61 | 64 |
| C2 | 63 | 59 | 51 | 42 | 39 | 42 | 51 | 60 | 65 |
| C3 | 68 | 63 | 54 | 43 | 41 | 42 | 53 | 63 | 69 |
| C4 | 67 | 61 | 54 | 44 | 42 | 44 | 54 | 64 | 70 |
| C5 | 87 | 77 | 65 | 54 | 51 | 52 | 64 | 77 | 87 |
| C6 | 64 | 59 | 53 | 43 | 39 | 39 | 51 | 59 | 65 |

Table : The regression slopes of the linear correlations of the Min. and Max. points of the tire data and the Peak values of the laboratory results.

|  |  |  | **Laboratory results** | | | | | | | | | | | | |
| --- | --- | --- | --- | --- | --- | --- | --- | --- | --- | --- | --- | --- | --- | --- | --- |
| **Tire α- sweep tests** | Figure 11 | Tire load  (kg) | Speed (km/h) | 0.2 | | | 2.1 | | | 6.5 | | | 11 | | |
| Load (N) | 55 | 75 | 95 | 55 | 75 | 95 | 55 | 75 | 95 | 55 | 75 | 95 |
| a | 350 | Regression slopes | 0.5 | 0.4 | 0.3 | 0.2 | 0.3 | 0.4 | 0.8 | 0.6 | 0.6 | 0.3 | 0.5 | 0.8 |
| b | 500 | 0.3 | 0.2 | 0.2 | 0.2 | 0.2 | 0.3 | 0.5 | 0.4 | 0.4 | 0.1 | 0.2 | 0.4 |
| c | 700 | 0.4 | 0.3 | 0.3 | 0.2 | 0.3 | 0.4 | 0.7 | 0.5 | 0.5 | 0.2 | 0.4 | 0.7 |
| d | 350 | 1.2 | 1.2 | 1.6 | 2.9 | 2.1 | 1.3 | 0.9 | 1.2 | 0.6 | 0.4 | 0.7 | 0.2 |
| e | 500 | 0.3 | 0.2 | 0.2 | 0.2 | 0.3 | 0.3 | 0.5 | 0.4 | 0.3 | 0.4 | 0.4 | 1.1 |
| f | 700 | 0.4 | 0.4 | 0.3 | 0.2 | 0.3 | 0.4 | 0.7 | 0.5 | 0.4 | 0.3 | 0.6 | 0.9 |
| **κ- sweep** |  | 350 | -41.7 | -35.4 | -34.8 | -23.0 | -32.2 | -38.2 | -59.4 | -50.7 | -66.3 | -14.9 | -27.8 | -67.2 |
|  | 500 | -24.8 | -21.6 | -20.9 | -13.6 | -19.3 | -24.7 | -39.2 | -30.8 | -47.0 | -1.7 | -4.4 | -23.0 |
|  | 700 | -28.5 | -25.2 | -22.3 | -12.5 | -20.0 | -26.9 | -42.7 | -34.7 | -42.7 | -5.2 | 2.7 | -21.7 |

Table 12: Full table of R2 values, κ-sweep tests addition to Table 7.

|  |  |  | **Laboratory results** | | | | | | | | | | | | |
| --- | --- | --- | --- | --- | --- | --- | --- | --- | --- | --- | --- | --- | --- | --- | --- |
| **Tire α- sweep tests** | Figure 11 | Tire load  (kg) | Speed (km/h) | 0.2 | | | 2.1 | | | 6.5 | | | 11 | | |
| Load (N) | 55 | 75 | 95 | 55 | 75 | 95 | 55 | 75 | 95 | 55 | 75 | 95 |
| a | 350 | R2 values: | 0.61 | 0.53 | 0.61 | **0.81** | 0.77 | 0.70 | **0.85** | 0.75 | 0.48 | 0.07 | 0.33 | 0.14 |
| b | 500 | 0.57 | 0.51 | 0.56 | 0.71 | 0.71 | 0.69 | **0.85** | 0.71 | 0.50 | 0.05 | 0.19 | 0.09 |
| c | 700 | 0.58 | 0.50 | 0.56 | 0.71 | 0.69 | 0.64 | **0.79** | 0.70 | 0.39 | 0.07 | 0.32 | 0.12 |
| d | 350 | 0.55 | 0.45 | 0.54 | 0.71 | 0.72 | 0.54 | 0.67 | 0.69 | 0.27 | 0.19 | 0.44 | 0.26 |
| e | 500 | 0.34 | 0.25 | 0.33 | 0.54 | 0.58 | 0.37 | 0.54 | 0.52 | 0.18 | 0.28 | 0.29 | 0.34 |
| f | 700 | 0.56 | 0.47 | 0.51 | 0.63 | 0.62 | 0.53 | 0.63 | 0.63 | 0.21 | 0.12 | 0.51 | 0.17 |
| **κ- sweep** |  | 350 | 0.58 | 0.52 | 0.71 | 0.81 | 0.80 | 0.61 | 0.57 | 0.71 | 0.69 | 0.03 | 0.12 | 0.10 |
|  | 500 | 0.50 | 0.47 | 0.61 | 0.68 | 0.69 | 0.62 | 0.60 | 0.63 | 0.83 | 0.00 | 0.01 | 0.03 |
|  | 700 | 0.61 | 0.58 | 0.64 | 0.53 | 0.68 | 0.67 | 0.65 | 0.74 | 0.63 | 0.01 | 0.00 | 0.02 |

Figure 16: Normalized tire α-sweep data of the 6 compounds at load 500 kg, replotted in a right-handed of Cartesian coordinate system.

Figure 17: Normalized tire α-sweep data of the 6 compounds at load 700 kg, replotted in a right-handed of Cartesian coordinate system.

Figure 18: Comparing the normalized tire data (left) with laboratory results at speed 6.5 km/h (right) at different loads for compounds C1, C2, C3, C5, C6 respectively.
